# Supplementary material for: One Step E-Beam Radiation Cross-Linking of Quaternary Hydrogels Dressings Based on Chitosan-Poly(Vinyl-Pyrrolidone)-Poly(ethylene Glycol)-Poly(Acrylic Acid)
Source: Preprints.org preprint supplement (doi:10.20944/preprints202011.0194.v1), 2020-11-04
Supplement: Supplementary file 1 [file supplementary]

**Supplementary Material**

One step e-beam radiation cross-linking of quaternary hydrogels dressings based on Chitosan-Poly(Vinyl-Pyrrolidone)-Poly(ethylene Glycol)-Poly(Acrylic acid)

**Ion Călina 1,2, Maria Demeter 1,*, Anca Scărișoreanu 1, Veronica Sătulu 1 and Bogdana Mitu1,***

1 National Institute for Lasers Plasma and Radiation Physics, 409 Atomiștilor, Măgurele, Romania

2 University of Bucharest, Faculty of Physics, 405 Atomiștilor, Măgurele, Romania

***** Correspondence: [maria.dumitrascu@inflpr.ro](mailto:maria.dumitrascu@inflpr.ro) (M.D.); [mitub@infim.ro](mailto:mitub@infim.ro) (B.M.)

**

**

**Figure S1.** The time evolution of swelling degree of hydrogels in PBS (pH = 7.4) at temperatures in the range 37 – 41 °C

**

**

**Figure S2.** The time evolution of swelling degree of hydrogels in the pH range 5.4 – 9.4 at 37 °C

**

**

**Figure S3. (a)** Calibration curve of IBU-EtOH (0.05-0.6 mg/mL) at 264 nm; (**b)** UV-Vis absorption spectra of IBU in EtOH


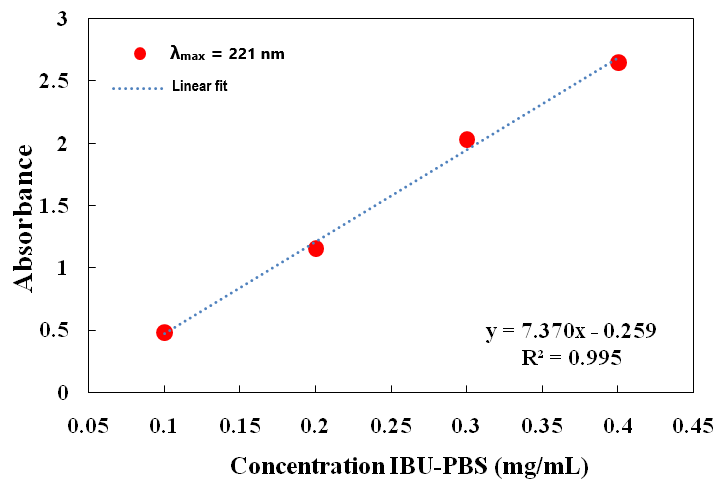


**Figure S4.** Calibration curve of IBU-PBS (0.1-0.4 mg/mL) at 221 nm
